# Supplementary material for: Comparison of support synthesis methods for TiO2and the effects of surface sulfates on its activity toward NH3-SCR
Source: Royal Society of Chemistry journal article supplement (doi:10.1039/c8nj04363a), 2018-12-12
Supplement: c8nj04363a1.pdf [file c8nj04363a1.pdf]

**Comparison of support synthesis method for TiO<sub>2</sub> and the effect of surface  
sulfates on its activity toward NH<sub>3</sub>-SCR**

Xuejun Zhang <sup>a</sup>, Yun Xing <sup>a</sup>, Zhongxian Song <sup>b\*</sup>, Heng Zhao <sup>a</sup>, Min Zhao <sup>a</sup>, Jinggang  
Zhao <sup>a</sup>, Zi'ang Ma <sup>a</sup>, Peipei Zhang <sup>c</sup>, Noritatsu Tsubaki<sup>c</sup>

(<sup>a</sup>College of Environmental and Safety Engineering, Shenyang University of  
Chemical Technology, Shenyang 110142, People's Republic of China; <sup>b</sup>Faculty of  
Environmental and Municipal Engineering, Henan Key Laboratory of Water Pollution  
Control and Rehabilitation Technology, Henan University of Urban Construction,  
Pingdingshan, 467036, People's Republic of China; <sup>c</sup>Department of Applied  
Chemistry, School of Engineering, University of Toyama, Gofuku 3190, Toyama  
930-8555, Japan)

Corresponding Authors:

\*Z. X. Song: email, songzhongxian@126.com, Tel., (+86)-375-2089031

## 1 XRD analysis

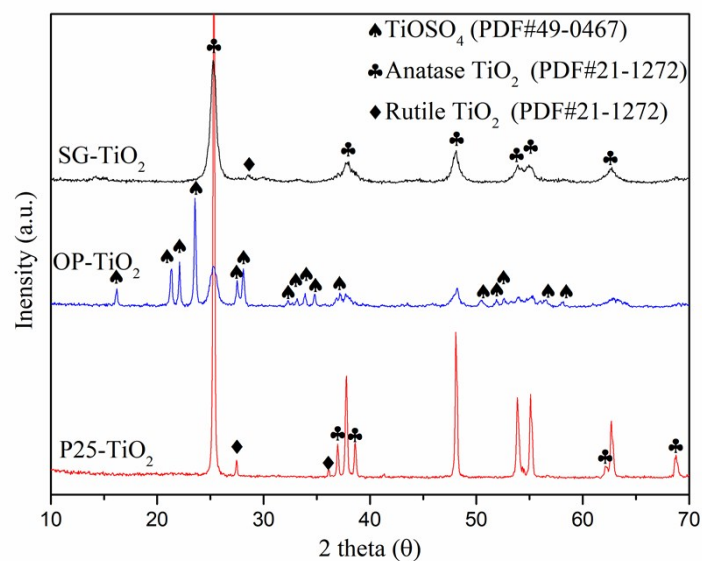

**Fig. S1** XRD profiles of SG-TiO<sub>2</sub>, P25-TiO<sub>2</sub> and OP-TiO<sub>2</sub> supports samples

The XRD profiles of SG-TiO<sub>2</sub>, P25-TiO<sub>2</sub> and OP-TiO<sub>2</sub> supports were performed and the results were shown in Fig. S1. It was obviously that both rutile and anatase TiO<sub>2</sub> phase were dominant detected on P25-TiO<sub>2</sub> and SG-TiO<sub>2</sub>, while the main phase of OP-TiO<sub>2</sub> was TiOSO<sub>4</sub> (PDF#49-0467). However, rutile TiO<sub>2</sub> was observed over IM-P25, which suggested that the sulphur treatment could contribute to the formation of anatase TiO<sub>2</sub>.

## 2. Micro-structure analysis

**Table S1** Specific surface area and total pore volume of the SG-TiO<sub>2</sub>, P25-TiO<sub>2</sub> and OP-TiO<sub>2</sub> supports samples

| Catalysts           | BET surface area,              | Total Pore volume,              | Average Pore diameter, |
|---------------------|--------------------------------|---------------------------------|------------------------|
|                     | m <sup>2</sup> g <sup>-1</sup> | cm <sup>3</sup> g <sup>-1</sup> | nm                     |
| SG-TiO <sub>2</sub> | 84                             | 0.240                           | 9.1                    |

|                      |    |       |      |
|----------------------|----|-------|------|
| P25-TiO <sub>2</sub> | 4  | 0.030 | 22.8 |
| OP-TiO <sub>2</sub>  | 58 | 0.201 | 10.9 |

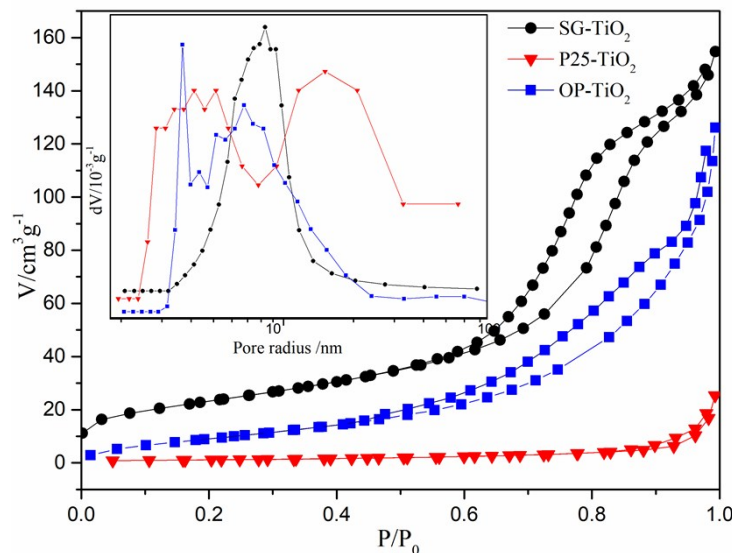

**Fig. S2.** N<sub>2</sub> adsorption/desorption isotherms and pore size distributions of the SG-TiO<sub>2</sub>, P25-TiO<sub>2</sub> and OP-TiO<sub>2</sub> supports samples

Fig. S2 exhibited the N<sub>2</sub> adsorption-desorption isotherms of the different TiO<sub>2</sub> supports. Each of the samples displayed a distorted type-IV isotherm, which was typical for mesoporous materials (2-50 nm). Compared with the TiO<sub>2</sub> supports and synthesis of CeO<sub>2</sub>-TiO<sub>2</sub>-H<sub>2</sub>SO<sub>4</sub> catalysts, the BET surface areas of IM-SG and IM-OP were decreased from 84 m<sup>2</sup>/g to 49 m<sup>2</sup>/g, 58 m<sup>2</sup>/g to 24 m<sup>2</sup>/g, respectively. The results confirmed that the preparation of impregnation-catalysts blocked the pores of the TiO<sub>2</sub> supports, which could decrease the BET surface areas of the catalysts. Furthermore, the BET surface area of IM-P25 was 8 m<sup>2</sup>/g, which might be related to the generation of rutile TiO<sub>2</sub>.
